1       **The influence of the social environment on larval development and resulting caste in**

2                                               ***Bombus impatiens***

3                                               Katherine Barie & Etya Amsalem\*

4

5     Department of Entomology, Center for Chemical Ecology, Center for Pollinator Research, Huck  
6     Institutes of the Life Sciences, Pennsylvania State University, University Park, PA 16802 U.S.A.

7

8     \*Corresponding author

9     Address: 215 Huck Life Sciences building, University Park 16802; +1 814 8637675

10    Email: [eua6@psu.edu](mailto:eua6@psu.edu)

11

12

13

14

15

16

17

18

19

20

21    Author's contributions

22    KB and EA designed the experiments, KB collected the data, KB and EA analyzed the data and  
23    wrote the manuscript.

24 **Abstract**

25 The ability of a single genome to express multiple phenotypes is key to understanding social  
26 evolution, where individuals with different morphologies perform different tasks. In social  
27 insects, phenotypes are typically determined during larval development and depend on the social  
28 environment. Here, we used the bumble bee *Bombus impatiens* to examine the social regulation  
29 of body size variation and caste by manipulating the identity (queen/worker) and the number of  
30 caretakers tending for the brood. Eggs of females and males were kept in cages with (1) a single  
31 queen; (2) a single worker; (3) three workers; or (4) ten workers. We measured larval weight,  
32 developmental length, and the resulting caste (in females) throughout the brood development of  
33 >2000 individuals. We found differences in larval mass when reared by varying number of  
34 workers, but not when reared by a single worker compared to a queen. Additionally, in contrast  
35 with previous findings in *B. terrestris*, none of the female eggs reared by workers developed into  
36 gynes (new queens), indicating that the mechanisms regulating caste determination in *B.*  
37 *impatiens* is not solely dependent on the queen presence as in *B. terrestris*. Adult males were  
38 slightly larger than workers and developed for a longer period in the presence of the queen.  
39 Overall, we suggest that body size in *B. impatiens* is determined by the number of caretakers and  
40 is likely mediated by the amount of provision. The hypothesis that the queen's presence  
41 manipulates female caste was not supported by our data.

42

43 **Keywords:** bumble bees, body size, caste determination, development, brood

## 44 **Introduction**

45 Phenotypic plasticity, the ability of one genome to produce multiple variations of behavioral and  
46 morphologic forms, is a fascinating phenomenon that is crucial for understanding how societies  
47 of social insects have evolved (Corona et al. 2016; West-Eberhard 1989). Diversity of  
48 phenotypes, such as females of various sizes and morphologies, is critical for sustaining social  
49 organization as they determine the female's life trajectory as reproductives or helpers.

50

51 Social insect societies contain three main castes: queens, workers, and males, while workers can  
52 differentiate even further to individuals of different sizes and morphologies (e.g., soldier workers  
53 in ants and termites). These differences have been documented in numerous social species  
54 (Miura 2005) and form the basis for their social organization. While in many cases, differences  
55 between female castes (queens and workers) are limited to body size (Alford 1975; Plowright  
56 and Jay 1968; Richards and Packer 1996; Treanore et al. 2020a; Tribble and Kronauer 2017;  
57 West-Eberhard 1969), female castes in some species exhibit additional morphological  
58 differences in the foraging organs or in the spermatheca (Gotoh et al. 2016; Gotoh et al. 2013;  
59 Khila and Abouheif 2010). Variation in worker body size and morphology is more common and  
60 is often associated with task allocation and reproductive roles. For example, in leaf-cutter ants,  
61 the smallest individuals specialize in tending the fungus garden and are more resistant to  
62 parasitic fungi (Poulsen et al. 2006; Wilson 1980). Likewise, individuals of the guard caste of the  
63 stingless bee, *Tetragonisca angustula*, are generally heavier, have smaller heads and larger legs  
64 than forager bees (Smith et al. 2008a). A morphologically-distinct soldier caste responsible for  
65 nest defense is also common among termites where soldiers have a sclerotized head, enlarged

66 mandibles, a stopper-like shape, or frontal glands which produce defensive secretions (Roisin  
67 2000). The majority of these morphs are determined during early development.  
68  
69 Body size and caste in social insects are influenced by the environment, genetics, or a  
70 combination of both (Schwander et al. 2010). In some ant species, such as *Wasmannia*  
71 *auropunctata* and *Vollenhovia emeryi*, caste is genetically determined with the worker caste  
72 being produced through sexual reproduction while queens are produced through parthenogenesis  
73 (Fournier et al. 2005; Kobayashi et al. 2008; Ohkawara et al. 2006). In Meliponine bees, caste is  
74 influenced by a combination of genetic and environmental factors. There, genetic markers in  
75 larvae are associated with the queen phenotype but require adequate nutritional input to develop  
76 into gynes (future queens) (Hartfelder et al. 2006; Kerr 1950). The same applies to the Florida  
77 harvester ant, *Pogonomyrmex badius*, where larval diet differs between castes but patrilineage  
78 also influences the resulting caste (Smith et al. 2008b). In many other social species, however,  
79 caste and body size are determined solely by environmental factors such as diet, feeding regime,  
80 thermoregulation, and colony social conditions (Eyer et al. 2017; Mao et al. 2013; Mutti et al.  
81 2011). In *Vespula maculifrons*, for example, both caste and body size are primarily determined  
82 by environmental factors and are not affected by the genetic patriline (Goodisman et al. 2007).  
83 Despite extensive study of phenotypic plasticity (Leimar et al. 2012; Libbrecht et al. 2013; Miura  
84 2005; Simpson et al. 2011; Weiner and Toth 2012), our knowledge of the environmental factors  
85 determining development, size, and caste is partial and is limited to selected model organisms,  
86 primarily ants and some termites, wasps, and bees.

87

88 The social regulators of caste and body size are often mediated by the adults, who take care of  
89 the immobile young. Adults dictate larval diet, clean and thermoregulate the brood (Jandt et al.  
90 2017; Molet et al. 2017; Yaguchi et al. 2019), and can manipulate not only the larval health but  
91 also their life trajectory. Differential feeding in the honey bee, for example, determines whether a  
92 female larva develops into a worker or a queen (Eyer et al. 2017; Mao et al. 2013; Mutti et al.  
93 2011), and thermoregulation of brood in social insects has been shown to influence broods'  
94 metabolic rate, growth, caste determination, and health (Howard and Jeanne 2004; Jones and  
95 Oldroyd 2006; Kadochová and Frouz 2014; Vogt 1986). The amount of care adults provide  
96 depends on the resources available for them, which are driven by the colony size, age and  
97 seasonality (Chole et al. 2019; DeGrandi-Hoffman et al. 2018; Hoover et al. 2006; Korb and  
98 Hartfelder 2008; Molet et al. 2017; Quezada-Euán et al. 2011; Villalta et al. 2016), but also by  
99 their reproductive interests, a theory known as “parental manipulation” in which the caretaker  
100 limits the provisioning of the brood to generate smaller or submissive individuals (Alexander  
101 1974b). Parental manipulation by the queen was demonstrated in *Polistes fuscatus* wasps where  
102 queens influence larval physiology and caste with vibrational signals in combination with  
103 nutritional input (Jeanne and Suryanarayanan 2011; Mignini and Lorenzi 2015; Suryanarayanan  
104 et al. 2011). Queens provide wasp larvae fewer vibrational signals, resulting in larvae with a  
105 lower likelihood of developing into gynes (Suryanarayanan et al. 2011). Similar works in *Apis*  
106 *mellifera* (Le Conte and Hefetz 2008), *Bombus terrestris* (Cnaani et al. 1997) and *Solenopsis*  
107 *invicta* (Fletcher and Blum 1981) showed that the presence of the queen inhibits the  
108 differentiation of larvae to gynes, presumably using pheromones. In some species of termites, the  
109 queen is the only individual in the colony able to provide the nutrients larvae require in order to

110 develop as sexuals (Korb and Hartfelder 2008; Yaguchi et al. 2019). Overall, the care received  
111 by adults is a strong regulator of larval development and caste in social insects.

112

113 Bumble bees are an excellent system for examining the social regulation of body size and caste,  
114 because both factors are influenced by the social environment (Cnaani et al. 2000b). However,  
115 despite some progress in the field (see below) the mechanisms underlying caste determination  
116 are not fully understood. Bumble bee colonies undergo several transitions during the colony life  
117 cycle that may result in young receiving differential care. When a bumble bee queen founds a  
118 colony, she is the sole caretaker of the brood until the first workers emerge. Female brood in  
119 bumble bees is laid by the queen, whereas male brood can be laid by both the queen and the  
120 workers (Amsalem et al. 2015). Male and workers brood develop for 24 days, on average, while  
121 queens require 36-37 days, on average, in both *B. impatiens* and *B. terrestris*. Eggs hatch within  
122 5 days and go through 4 larva instars, after which they pupate and emerge (Cnaani et al. 2000b;  
123 Cnaani et al. 2000c; Cnaani et al. 2002; Tian and Hines 2018). Castes differ mostly in body size  
124 (Goulson 2010; Michener and Michener 1974), with queens being 3-4 times larger than workers,  
125 whereas males are slightly larger than workers (Goulson 2010; Michener and Michener 1974;  
126 Plowright and Jay 1968). Bumble bee workers' body mass within the same colony can vary up to  
127 tenfold (Couvillon and Dornhaus 2010; Cumber 1949), and size variation is often associated with  
128 task specialization (Holland et al. 2021; Jandt et al. 2009).

129

130 The mechanisms determining female caste and size in bumble bees are not fully understood and  
131 the existing data point to a substantial variation across species and sometimes to conflicting data.  
132 In *B. terrestris*, the species that was investigated the most, diet composition of provisions is not

133 different for queens and workers (Pereboom 2000). However, queens are fed more frequently  
134 than workers in the later stages of larval development (Ribeiro et al. 1999), although this has not  
135 been confirmed in a later study (Pereboom et al. 2003). Furthermore, diploid eggs develop to  
136 gynes in the absence of the queen, as long as they are separated from the queen before the critical  
137 period for differentiation (approximately 5 days after larvae hatch) (Cnaani et al. 1997; Cnaani et  
138 al. 2000c). A similar critical period during early development was found in *B. terricola*  
139 (Plowright and Pendrel 1977; Röseler 1970), but a much later critical point for differentiation  
140 was found in *B. hypnorum*, *B. rufocinctus*, and *B. ternarius*. In these species it was further  
141 suggested that queen determination depends on food quantity and feeding regimes during  
142 development (Plowright and Jay 1977; Plowright and Pendrel 1977; Röseler 1970). Queens and  
143 workers in these species have similar growth rates but queens are supplied additional food for  
144 longer (Röseler 1976).

145  
146 The frequency of larval feeding in *B. terrestris* and *B. terricola* influences not only caste, but  
147 also worker body mass (Pendrel and Plowright 1981; Pereboom et al. 2003). A study that  
148 manipulated the pollen intake of *B. terricola* colonies found that reduced food intake of colonies  
149 resulted in smaller-bodied workers (Sutcliffe and Plowright 1988). Furthermore, larvae on the  
150 periphery of *B. impatiens* colonies are fed less frequently than larvae towards the center of the  
151 colony, also resulting in smaller individuals. Variation in worker size is also affected by the  
152 presence of the queen. A previous study in *B. terrestris* showed that brood reared by a queen was  
153 significantly smaller than brood reared by a worker (Shpigler et al. 2013). A similar study in *B.*  
154 *impatiens* examined development in brood reared by five workers vs. one queen, and found that

155 the queen produced smaller individuals, although whether the effect is due to the identity of the  
156 caretaker or their number is not clear (Costa et al. 2021).

157

158 In this study, we examined how the social environment, specifically, the identity/caste and the  
159 number of the caretaking females affect larval body mass, duration of development and caste in  
160 the bumble bee *B. impatiens*. Phylogenetically, *B. impatiens* is much closer to bumble bee  
161 species where caste and body size are determined by diet and later in development than to *B.*  
162 *terrestris* where these factors are influenced solely by the presence of the queen (Cameron et al.  
163 2007), but mechanistic details of caste determination in this species are still lacking . To examine  
164 this, we grouped female and male eggs with a queen or a varying number of workers (1, 3 and  
165 10). We anticipated that the identity of the caretaker (i.e., queen or worker) would affect female  
166 caste. We also expected the number of the caretakers to positively correlate with body size and  
167 brood development. Finally, we hypothesized that a selective effect by the queen on females'  
168 body size and development, but not on males, would indicate a parental manipulation aiming to  
169 control the resulting female caste and generate submissive and sterile workers.

170

## 171 **Methods**

172

### 173 *Bumble bees rearing*

174 Colonies of *B. impatiens* were obtained from Koppert USA, Inc. (Romulus, MI) and were used  
175 as a source for caretakers (workers and queens) and egg laying females producing male and  
176 female egg batches. Bumble bees lay eggs in batches, containing up to 10 eggs each, and seal  
177 them with wax (Amsalem et al. 2015). In all experiments, groups containing 1 and 3 caretakers



178 were kept in small plastic cages (11 cm diameter × 7 cm tall) whereas groups containing 10  
179 caretakers were kept in larger plastic cages (19 x 16.5 x 14 cm) (i.e., to maintain similar density  
180 of worker across treatments). Group sizes were chosen based on a previous study showing that  
181 reproductive division of labor in groups of 10 workers is similar to a colony (~40% of the  
182 females activate their ovaries and lay eggs), as opposed to smaller groups containing 3 and 5  
183 individuals, where reproduction is monopolized by a single bee (Amsalem and Hefetz 2011). All  
184 bees were kept in a dark environmental chamber, at 28-30° C and 60% relative humidity and  
185 provided an unlimited supply of pollen and 60% sugar solution.

186

#### 187 *Social condition treatments*

188 To examine how caretaker identity affects brood development, we set up cages (n=97)  
189 containing an egg-layer queen or a random-age worker together with a single 4-days-old egg  
190 batch of either females or males. To examine how the number of caretakers affect brood  
191 development, we set up 141 cages with 1, 3, and 10 random-age workers together with a 4-days-  
192 old egg batch of either female or male brood. Cages were sampled at different time points,  
193 covering the entire duration of brood development (egg to adult). In each cage, we measured  
194 larval weight, duration of development, sex, and caste. Caretaker workers were taken from  
195 young colonies which were not producing males or young queens. Caretaker queens were taken  
196 from colonies upon emergence. They were mated with unrelated males and treated with CO<sub>2</sub> to  
197 induce transition to egg laying as in (Treanore et al. 2021). They were then placed in individual  
198 cells until they confirmed to lay eggs. Female eggs were laid by mated queens while male eggs  
199 were laid by unmated queens or workers. Cages producing eggs were checked for eggs every 24  
200 hours and were photographed and tagged to keep track of the date eggs were laid. Egg batches

201 were then gently transferred to a treatment cage (i.e., with caretakers) 4 days after they were laid,  
202 thus, before hatching and before the earliest critical period for determination (5-6 days after  
203 larvae hatch) found in *B. terrestris* (Cnaani et al. 2000b). Workers may lay eggs in the absence of  
204 the queen (Amsalem et al. 2015), thus, new egg batches laid by the caretakers after the onset of  
205 the experiment were removed daily. Caretakers and egg batches were unrelated across both  
206 experiments, since brood care in *B. impatiens* is not affected by relatedness (Starkey et al. 2019).

207

#### 208 *Larval development duration, weight, and caste*

209 Brood (eggs, larvae, pupae) or newly-emerged adults were collected daily between days 6 to 26  
210 after the onset of egg laying. At least 10 individuals were collected for each day across all cages  
211 in the treatment groups and overall, 2001 brood and newly-emerged adults were collected in the  
212 study. The brood was frozen and removed from their wax cases. The developmental stage of the  
213 brood (eggs, larvae, pupae, or newly-emerged adults) was determined, individuals were weighed,  
214 and the caste was determined for female individuals based on body mass. Workers and males  
215 weigh approximately up to 300 mg, while queens weigh >450 mg and can reach up to 1 g.  
216 Usually, there is no overlap in the body mass of workers and queens (Amsalem et al. 2015)

217

#### 218 *Statistical analysis*

219 Statistical analyses and data visualizations were performed using JMP Pro 16. The effects of the  
220 treatments (1, 3, 10 workers or a queen), the time (days since egg laying), and sex (female, male)  
221 on the body mass and duration of development of the brood were compared using ANOVA  
222 mixed model. Post-hoc comparisons between treatment groups were conducted using Tukey  
223 HSD test. The growth rate of larvae across treatments and sexes was compared using indicator

224 function parameterization. Data are presented as means  $\pm$  S.E.M. Statistical significance was  
225 accepted at  $\alpha=0.05$ .

226

## 227 **Results**

228 We monitored the development, body mass and caste of 2001 individual brood in the study and  
229 examined how the two sexes are affected by the number and identity of the caretaker. Most  
230 larvae hatched within 6 days, a slightly older age than in *B. impatiens* (Cnaani et al. 2002),  
231 although this could be explained by the method of counting (i.e., whether the first day eggs are  
232 found is considered day 0 or 1). The youngest age of larvae was 6 days (from egg laying) while  
233 the oldest was 18 (Table 1). The earliest pupation occurred on day 14 and lasted, to the latest,  
234 until day 26. All brood emerged on days 24-26 (males and workers) and none of the developed  
235 brood was of queens. The development of larvae and pupae in this study is similar to the one  
236 reported previously for males and workers of *B. impatiens* (Cnaani et al. 2002) and *B. terrestris*  
237 females (Cnaani et al. 2000c).

238

239 Body mass of female larvae, pupae and adults throughout the development was affected by the  
240 time (days after egg laying, Mixed model, Two-way ANOVA  $f_{1,1024}=628.5$ ,  $p<0.0001$ ) and by  
241 the treatment (1, 3, 10 workers or a queen,  $f_{3,1024}=39$ ,  $p<0.001$ ), however a post-hoc test for the  
242 variable treatment showed that the significant impact is attributed to the number of caretakers  
243 and not to their identity (post-hoc Tukey HSD  $p<0.01$  for all comparisons except one queen vs.  
244 one worker,  $p=0.08$ , Figure 1A). A queen and a single worker produced approximately similarly-  
245 sized larvae (on average  $189\pm 13$  and  $195\pm 10$  mg at the peak of development,  $n=10$  and  $n=15$  for  
246 one worker and a queen, respectively, means  $\pm$  SE), while 3 and 10 worker groups produced

247 much larger larvae (on average  $231 \pm 6$  and  $252 \pm 17$  mg at the peak of development,  $n=10$  and  
248  $n=10$  for 3 and 10 worker groups, respectively, means  $\pm$  SE). The ‘peak of development’ refers  
249 to the timepoint (day) with the highest body mass of larvae.

250

251 Body mass of male larvae, pupae and adults was also affected by the time (Mixed model, Two-  
252 way ANOVA  $f_{1,973}=614.9$ ,  $p<0.0001$ ) and the treatment ( $f_{3,973}=59.8$ ,  $p<0.001$ ), and a post-hoc  
253 test showed similar results to females with a significant effect by the number of caretakers but  
254 not their identity (post-hoc Tukey HSD  $p<0.001$  for all comparisons except one queen vs. one  
255 worker,  $p=0.64$ , Figure 1B). Male larvae were overall slightly larger than females (on average  
256  $179.4 \pm 9$ ,  $179.3 \pm 10$ ,  $243.8 \pm 13$ , and  $280 \pm 20$  mg at the peak of development,  $n=14$ , 11, 13, 11 for  
257 queen, groups of 1, 3 and 10 workers, respectively, means  $\pm$  SE), but this difference was not  
258 statistically significant (Mixed model with time, sex and treatment as fixed effects,  $f_{1,1999}=  
259 1243.4$ ,  $p<0.0001$  for time;  $f_{3,1999}=97$ ,  $p<0.0001$  for treatment, and  $f_{1,1999}=0.68$ ,  $p=0.4$  for sex, Fig  
260 2).

261

262 We also separately analyzed the data of female and male larvae to examine differences in their  
263 growth rate during the feeding period when reared by a queen and varying numbers of workers.  
264 To perform this analysis, we included all the brood that was still larvae at the time of collection  
265 (Table 1). This included 523 female and 472 male larvae. The fit of the mass gain curves over  
266 time in all treatments and in both sexes was linear ( $R^2>0.74$ ). Comparison of slopes in females  
267 and male returned similar results to the comparison of the means above, confirming once again  
268 that the number of caretakers but not their identity affects body mass gain in larvae (indicator  
269 function parameterization for queen vs. one worker: estimate: -3.2, Std Error: 3.66, t-ratio: -0.9,

270  $p=0.37$ ; for queen vs. 3 workers: estimate: 9.3, Std Error: 3.8, t-ratio: 2.45,  $p=0.01$ ; and for queen  
271 vs. 10 workers: estimate: 18.9, Std Error: 3.7, t-ratio: 5.1,  $p<0.001$ , Fig 3A). Similar analysis of  
272 male larvae returned similar results (indicator function parameterization for queen vs. one  
273 worker: estimate: 5.8, Std Error: 4.9, t-ratio: 1.18,  $p=0.23$ ; for queen vs. 3 workers: estimate:  
274 13.1, Std Error: 4.8, t-ratio: 2.7,  $p=0.007$ ; and for queen vs. 10 workers: estimate: 35.1, Std  
275 Error: 4.9, t-ratio: 7.05,  $p<0.001$ , Fig 3B).

276

277 Finally, we analyzed the effect of treatment and sex on the weight gain and development  
278 duration of the brood that emerged throughout the experiment (Fig. 4). This included 47 and 48  
279 female and male adults, respectively (Table 1). Treatment had a significant effect on body mass  
280 of females ( $f_{3,45}=27.15$ ,  $p<0.001$  followed by Tukey HSD post-hoc test  $p=0.6$  for one worker vs.  
281 a queen and  $p<0.004$  for all the rest) and males ( $f_{3,46}=26.8$ ,  $p<0.001$  followed by Tukey HSD  
282 post-hoc test  $p=0.98$  for one worker vs. a queen and  $p<0.03$  for all the rest). Within each  
283 treatment, females and males differed in the 10 workers ( $p=0.01$ ) and the queen ( $p=0.009$ )  
284 treatments but not in the one worker ( $p=0.68$ ) or 3 worker ( $p=0.34$ ) treatments.

285

286 The treatment also affected the duration of development in females ( $f_{3,45}=3.37$ ,  $p=0.02$  followed  
287 by Tukey HSD post-hoc test  $p=0.03$  for 10 workers vs. a queen and  $p>0.064$  for all the rest) and  
288 males ( $f_{3,46}=3.77$ ,  $p=0.01$  followed by Tukey HSD post-hoc test  $p=0.04$  for 3 workers vs. a  
289 queen,  $p=0.01$  for 10 workers vs. a queen and  $p>0.1$  for all the rest). Within each treatment,  
290 females and males differed in the queen treatment ( $p<0.001$ ) but not in any of the other  
291 treatments ( $p>0.33$ ).

292

293 **Discussion**

294 This study investigated how the social environment affects brood development in *B. impatiens*.  
295 We examined the effect of caretaker identity and their number on brood developmental duration,  
296 body mass, and resulting caste. Overall, we found that body size is affected by the number of  
297 caretakers but not their identity. Additionally, all the female eggs in our study developed into  
298 workers, regardless of the identity or the number of the caretakers, indicating that the mechanism  
299 determining caste in *B. impatiens* is different than the one in *B. terrestris* and is not solely  
300 dependent on the presence of the queen. It is important to note that gynes are typically produced  
301 in full-size colonies of *B. impatiens* towards the end of the life cycle, but there is high variability  
302 across colonies and the reasons for it are unknown. In a recent study (Santos et al. 2022), we  
303 have shown that increasing the amount of the brood in the colony also increases the number of  
304 gynes produced by the colony, while decreasing the amount of brood results in colonies  
305 specializing in producing males. As far as we know, nobody was able to produce gynes in *B.*  
306 *impatiens* in a setting that is not a full-size colony. These results are fundamentally different  
307 from *B. terrestris* where ~80% of the eggs that were transplanted between queenright and  
308 queenless colonies developed into gynes (Cnaani et al. 1997; Cnaani et al. 2000c) and gynes  
309 were produced also in small groups of workers (Shpigler et al. 2013). To our knowledge, this is  
310 the first time these questions are examined experimentally in *B. impatiens* or in any other species  
311 of *Bombus* that is not *B. terrestris*.

312

313 The number of caretakers influenced brood development in a positive way, with an increase in  
314 the growth rate and emergence weight as the number of caretakers increased. Similar impacts of  
315 the colony size have been observed in other social insect species (Korb and Hartfelder 2008;

316 Molet et al. 2017; Plowright and Jay 1968; Plowright and Pendrel 1977; Ramalho et al. 1998).  
317 These effects are likely mediated via an increase in feeding frequency, attributed to the number  
318 of caretakers (Pereboom et al. 2003; Ribeiro et al. 1999). Interestingly, the size differences  
319 between female and male brood were minor and apparent only in the adults reared by the queen  
320 and not throughout development (Fig. 4). In contrast, *B. terrestris* males were reported to be  
321 larger and fed more frequently than workers (Ribeiro et al. 1999; Shpigler et al. 2013). However,  
322 an analysis of *Bombus* species found a large overlap in the size range of males and workers, and  
323 although males are generally larger in *B. terrestris*, this is not the case in *B. impatiens* (Del  
324 Castillo and Fairbairn 2012).

325

326 We found no effect of caretaker identity on the developmental time, growth rate, and weight at  
327 emergence, with the brood reared by a single worker being similar in all parameters to the brood  
328 reared by a queen. Based on the parental manipulation hypothesis, it is predicted that the queen  
329 would manipulate brood development to produce smaller workers in order to reduce competition  
330 with her offspring (Alexander 1974a). Accordingly, we expected that queen-reared brood would  
331 develop quicker and be smaller than worker-reared brood as was found in *B. terrestris* (Shpigler  
332 et al. 2013). However, since the queen has no competition with males, we expected this effect to  
333 be specific to female eggs. Conversely, we found that a queen-reared brood was not significantly  
334 smaller nor developed faster than a worker-reared brood. The difference in body size of brood  
335 reared by workers and queens in *B. terrestris* could be the result of worker rearing gynes in the  
336 absence of the queen. However, decreased developmental time in individuals reared by the queen  
337 was observed even when no gynes were produced, suggesting that in *B. terrestris*, but not in *B.*  
338 *impatiens*, the queen is able to manipulate worker size. In line with these findings, a previous

339 study in *B. impatiens* also found no differences in the developmental time of female brood reared  
340 by a queen versus brood reared by five workers (Costa et al. 2021). However, this study did find  
341 that a single queen produced smaller individuals compared to the worker social condition, but  
342 this finding may be confounded by the number of caretaker (a single queen versus 5 workers)  
343 (Costa et al. 2021). Potentially, both queens and workers in *B. impatiens* may preferentially  
344 produce smaller individuals when there are a few caretakers because it may be less costly and  
345 require less provisioning to produce smaller individuals (Cnaani and Hefetz 2001; Couvillon and  
346 Dornhaus 2010).

347  
348 Regardless of caretaker identity or number, no gynes were produced in any of the social  
349 condition treatments. The absence of a queen has been shown to incite rearing of gynes in  
350 several social insects such as the ant species *Aphaenogaster senilis* and *Atta sexdens* and honey  
351 bees (Boulay et al. 2009; Tarpay et al. 2000; Winston 1991). Additionally, in *B. terrestris*, close to  
352 80% of the female brood that was reared in the absence of the queen and that was transplanted  
353 before the critical period for differentiation, developed into gynes or intercastes in both full-size  
354 colonies (Cnaani et al. 2000a), and also in small groups of 10 workers (Shpigler et al. 2013), and  
355 increased colony size affected the production of new gynes in several studies (Bloch 1999;  
356 Pereboom et al. 2005). However, in this study we found an increase in brood body mass (within  
357 the range of a worker) with the increase in the number of caretakers but did not observe gyne  
358 production even in the ten-caretaker condition, meaning that the queen is not the sole factor  
359 affecting caste determination and gyne production.

360



361 That being said, a group of ten workers may not be sufficient for inducing gyne production in *B.*  
362 *impatiens* and an increase in the number of nurses combined with the absence of the queen may  
363 have resulted in gyne production. A previous study in several bumble bee species has suggested  
364 a certain worker/larva ratio needs to be achieved for gyne production (Plowright and Jay 1968).  
365 This ratio, however, may vary across bumble bee species. In some ant species it has been  
366 reported that the number of workers constrained reproductive decisions, and the production of  
367 gynes was lower in smaller than in larger groups. In the instances of low worker numbers,  
368 rearing gynes may require an overhead that small worker groups cannot afford (Ruel et al. 2012).  
369  
370 Since we observed no difference in brood reared by one worker and one queen, our data do not  
371 indicate that there is an active manipulation of the queen on worker body mass or duration of  
372 development. The data further show that no gynes were produced in any of the worker cages,  
373 questioning whether the queen's presence is as important for gyne production in *B. impatiens* as  
374 it is in *B. terrestris*. Data in *B. impatiens* support a much simpler model in which worker size  
375 (and maybe also caste) are dependent on the number of caretakers and consequently, the amounts  
376 of resources. Size variation in workers can be explained along the same lines with the production  
377 of relatively smaller individuals either early in the season, when fewer caretakers are available,  
378 or very late in the season, when resources are no longer available (Treanore et al. 2020b). *B.*  
379 *impatiens* may have a similar caste determination mechanism to that seen in *Bombus hypnorum*,  
380 *Bombus rufocinctus*, and *Bombus ternarius*, to which they are more closely related (Cameron et  
381 al. 2007) and where caste determination depends on food quantity and feeding regimes during  
382 development (Plowright and Jay 1977; Plowright and Pendrel 1977; Roseler, 1970; Roseler and

383 Roseler 1974). However, the detailed mechanisms determining gyne production in this species  
384 are yet to be explored.

385

386 **Acknowledgments.** We thank the MS committee members of KB (DRs Heather Hines, Christina  
387 Grozinger and Rudolf Schilder) for reading and providing feedback on previous drafts of the  
388 manuscript.

389

390 **Declarations**

391

392 **Funding.** This work was supported by the Penn State Graduate Training Program in Integrative  
393 Pollinator Ecology, funded by the USDA-NIFA-NNF Program (2017-38420-26766) to KB.

394 **Conflict of interests.** The authors declare no conflicts of interests

395 **Ethics approval.** A license or certificate was not required through Pennsylvania State University  
396 for experiments involving bees. Nevertheless, we conducted all experiments in accordance with  
397 international animal care and use ethical standards.

398 **Availability of data and material.** The datasets used and/or analyzed during the current study  
399 are available from the corresponding author on reasonable request.

400

401

## 402 **References**

403

- 404 Alexander RD (1974a) The Evolution of Social Behavior. Annual Review of Ecology and Systematics  
405 5:325-383. doi: 10.1146/annurev.es.05.110174.001545
- 406 Alexander RD (1974b) Evolution of Sterile Castes in the Social Insects: Kin Selection or Parental  
407 Manipulation? Florida Entomologist 57:32-32
- 408 Alford DV (1975) Bumblebees. Davis-Poynter, London
- 409 Amsalem E, Grozinger CM, Padilla M, Hefetz A (2015) The physiological and genomic bases of bumble  
410 bee social behaviour. In: Amro Z, Clement FK (eds) Genomics, Physiology and Behaviour of Social  
411 Insects, vol 48. Academic Press, Adv In Insect Phys, pp 37-93
- 412 Amsalem E, Hefetz A (2011) The effect of group size on the interplay between dominance and  
413 reproduction in *Bombus terrestris*. PLoS One 6:e18238. doi: 10.1371/journal.pone.0018238
- 414 Bloch G (1999) Regulation of queen-worker conflict in bumble bee (*Bombus terrestris*) colonies.  
415 Proceedings of the Royal Society of London. Series B: Biological Sciences 266:2465-2469. doi:  
416 10.1098/rspb.1999.0947
- 417 Boulay R, Cerdá X, Fertin A, Ichinose K, Lenoir A (2009) Brood development into sexual females depends  
418 on the presence of a queen but not on temperature in an ant dispersing by colony  
419 fission, *Aphaenogaster senilis*. Ecological Entomology 34:595-602. doi: 10.1111/j.1365-  
420 2311.2009.01108.x
- 421 Cameron SA, Hines HM, Williams PH (2007) A comprehensive phylogeny of the bumble bees (*Bombus*).  
422 Biological Journal of the Linnean Society 91:161-188. doi: 10.1111/j.1095-8312.2007.00784.x
- 423 Chole H, Woodard SH, Bloch G (2019) Body size variation in bees: regulation, mechanisms, and  
424 relationship to social organization. Current Opinion in Insect Science 35:77-87. doi:  
425 10.1016/j.cois.2019.07.006
- 426 Cnaani J, Borst DW, Huang ZY, Robinson GE, Hefetz A (1997) Caste determination in *Bombus terrestris*:  
427 Differences in development and rates of JH biosynthesis between queen and worker Larvae.  
428 Journal of Insect Physiology 43:373-381. doi: 10.1016/s0022-1910(96)00106-0
- 429 Cnaani J, Hefetz A (2001) Are queen *Bombus terrestris* giant workers or are workers dwarf queens?  
430 Solving the 'chicken and egg' problem in a bumblebee species. Naturwissenschaften 88:85-87.  
431 doi: 10.1007/s001140000202
- 432 Cnaani J, Robinson GE, Bloch G, Borst D, Hefetz A (2000a) The effect of queen-worker conflict on caste  
433 determination in the bumblebee *Bombus terrestris*. Behavioral Ecology and Sociobiology 47:346-  
434 352. doi: 10.1007/s002650050675
- 435 Cnaani J, Robinson GE, Hefetz A (2000b) The critical period for caste determination in *Bombus terrestris*  
436 and its juvenile hormone correlates. Journal of Comparative Physiology A: Sensory, Neural, and  
437 Behavioral Physiology 186:1089-1094. doi: 10.1007/s003590000163
- 438 Cnaani J, Robinson GE, Hefetz A (2000c) The critical period for caste determination in *Bombus terrestris*  
439 and its juvenile hormone correlates. J Comp Physiol A 186:1089-1094. doi:  
440 10.1007/s003590000163
- 441 Cnaani J, Schmid-Hempel R, Schmidt JO (2002) Colony development, larval development and worker  
442 reproduction in *Bombus impatiens* Cresson. Insectes Sociaux 49:164-170. doi: 10.1007/s00040-  
443 002-8297-8
- 444 Corona M, Libbrecht R, Wheeler DE (2016) Molecular mechanisms of phenotypic plasticity in social  
445 insects. Curr Opin Insect Sci 13:55-60. doi: 10.1016/j.cois.2015.12.003

- 446 Costa CP, Fisher K, Guillén BM, Yamanaka N, Bloch G, Woodard SH (2021) Care-giver identity impacts  
447 offspring development and performance in an annually social bumble bee. *BMC Ecology and*  
448 *Evolution* 21. doi: 10.1186/s12862-021-01756-2
- 449 Couvillon MJ, Dornhaus A (2010) Small worker bumble bees (*Bombus impatiens*) are hardier against  
450 starvation than their larger sisters. *57:193-197*. doi: 10.1007/s00040-010-0064-7
- 451 Cumber R (1949) The biology of humble-bees, with special reference to the production of the worker  
452 caste. The Royal Entomological Society of London
- 453 DeGrandi-Hoffman G et al. (2018) Connecting the nutrient composition of seasonal pollens with  
454 changing nutritional needs of honey bee (*Apis mellifera* L.) colonies. *J Insect Physiol* 109:114-  
455 124. doi: 10.1016/j.jinsphys.2018.07.002
- 456 Del Castillo RC, Fairbairn DJ (2012) Macroevolutionary patterns of bumblebee body size: detecting the  
457 interplay between natural and sexual selection. *Ecology and Evolution* 2:46-57. doi:  
458 10.1002/ece3.65
- 459 Eyer M, Dainat B, Neumann P, Dietemann V (2017) Social regulation of ageing by young workers in the  
460 honey bee, *Apis mellifera*. *Exp Gerontol* 87:84-91. doi: 10.1016/j.exger.2016.11.006
- 461 Fletcher DJ, Blum MS (1981) Pheromonal control of dealation and oogenesis in virgin queen fire ants.  
462 *Science* 212:73-75. doi: 10.1126/science.212.4490.73
- 463 Fournier D et al. (2005) Clonal reproduction by males and females in the little fire ant. *Nature* 435:1230-  
464 1234
- 465 Goodisman MA, Kovacs JL, Hoffman EA (2007) Lack of conflict during queen production in the social  
466 wasp *Vespula maculifrons*. *Molecular ecology* 16:2589-2595
- 467 Gotoh A, Billen J, Hashim R, Ito F (2016) Degeneration patterns of the worker spermatheca during  
468 morphogenesis in ants (Hymenoptera: Formicidae). *Evolution & Development* 18:96-104. doi:  
469 10.1111/ede.12182
- 470 Gotoh A, Ito F, Billen J (2013) Vestigial spermatheca morphology in honeybee workers, *Apis cerana* and  
471 *Apis mellifera*, from Japan. *Apidologie* 44:133-143
- 472 Goulson D (2010) Bumblebees: behaviour, ecology, and conservation. Oxford University Press on  
473 Demand
- 474 Hartfelder K et al. (2006) Physiological and genetic mechanisms underlying caste development,  
475 reproduction and division of labor in stingless bees. *Apidologie* 37:144-163. doi:  
476 10.1051/apido:2006013
- 477 Holland J, Nakayama S, Porfiri M, Nov O, Bloch G (2021) Body Size and Behavioural Plasticity Interact to  
478 Influence the Performance of Free-Foraging Bumble Bee Colonies. *Insects* 12:236. doi:  
479 10.3390/insects12030236
- 480 Hoover SER, Higo HA, Winston ML (2006) Worker honey bee ovary development: seasonal variation and  
481 the influence of larval and adult nutrition. *Journal of Comparative Physiology B* 176:55-63. doi:  
482 10.1007/s00360-005-0032-0
- 483 Howard K, Jeanne R (2004) Rates of brood development in a social wasp: effects of colony size and  
484 parasite infection. *Insectes sociaux* 51:179-185
- 485 Jandt JM, Huang E, Dornhaus A (2009) Weak specialization of workers inside a bumble bee (*Bombus*  
486 *impatiens*) nest. *Behavioral Ecology and Sociobiology* 63:1829-1836. doi: 10.1007/s00265-009-  
487 0810-x
- 488 Jandt JM, Suryanarayanan S, Hermanson JC, Jeanne RL, Toth AL (2017) Maternal and nourishment  
489 factors interact to influence offspring developmental trajectories in social wasps. *Proceedings of*  
490 *the Royal Society B: Biological Sciences* 284:20170651. doi: 10.1098/rspb.2017.0651
- 491 Jeanne RL, Suryanarayanan S (2011) A new model for caste development in social wasps.  
492 *Communicative & Integrative Biology* 4:373-377. doi: 10.4161/cib.15262

- 493 Jones JC, Oldroyd BP (2006) Nest thermoregulation in social insects. *Advances in insect Physiology*  
494 33:153-191
- 495 Kadochová Š, Frouz J (2014) Thermoregulation strategies in ants in comparison to other social insects,  
496 with a focus on red wood ants (*Formica rufa* group). *F1000Research* 2:280. doi:  
497 10.12688/f1000research.2-280.v2
- 498 Kerr WE (1950) Evolution of the mechanism of caste determination in the genus *Melipona*. *Evolution*:7-  
499 13
- 500 Khila A, Abouheif E (2010) Evaluating the role of reproductive constraints in ant social evolution. *Philos*  
501 *Trans R Soc Lond B Biol Sci* 365:617-630. doi: 10.1098/rstb.2009.0257
- 502 Kobayashi K, Hasegawa E, Ohkawara K (2008) Clonal reproduction by males of the ant *Vollenhovia*  
503 *emeryi* (Wheeler). *Entomological Science* 11:167-172
- 504 Korb J, Hartfelder K (2008) Life history and development - a framework for understanding  
505 developmental plasticity in lower termites. *Biological Reviews* 83:295-313. doi: 10.1111/j.1469-  
506 185x.2008.00044.x
- 507 Le Conte Y, Hefetz A (2008) Primer pheromones in social hymenoptera. *Annu Rev Entomol* 53:523-542.  
508 doi: 10.1146/annurev.ento.52.110405.091434
- 509 Leimar O, Hartfelder K, Laubichler MD, Page RE, Jr. (2012) Development and evolution of caste  
510 dimorphism in honeybees - a modeling approach. *Ecol Evol* 2:3098-3109. doi: 10.1002/ece3.414
- 511 Libbrecht R, Corona M, Wende F, Azevedo DO, Serrao JE, Keller L (2013) Interplay between insulin  
512 signaling, juvenile hormone, and vitellogenin regulates maternal effects on polyphenism in ants.  
513 *Proc Natl Acad Sci U S A* 110:11050-11055. doi: 10.1073/pnas.1221781110
- 514 Mao W, Schuler MA, Berenbaum MR (2013) Honey constituents up-regulate detoxification and  
515 immunity genes in the western honey bee *Apis mellifera*. *Proc Natl Acad Sci U S A* 110:8842-  
516 8846. doi: 10.1073/pnas.1303884110
- 517 Michener CD, Michener CD (1974) *The social behavior of the bees: a comparative study*. Harvard  
518 University Press
- 519 Mignini M, Lorenzi MC (2015) Vibratory signals predict rank and offspring caste ratio in a social insect.  
520 *Behavioral Ecology and Sociobiology* 69:1739-1748. doi: 10.1007/s00265-015-1986-x
- 521 Miura T (2005) Developmental regulation of caste-specific characters in social-insect polyphenism.  
522 *Evolution & development* 7:122-129
- 523 Molet M, Péronnet R, Couette S, Canovas C, Doums C (2017) Effect of temperature and social  
524 environment on worker size in the ant *Temnothorax nylanderi*. *Journal of Thermal Biology*  
525 67:22-29. doi: 10.1016/j.jtherbio.2017.04.013
- 526 Mutti NS, Dolezal AG, Wolschin F, Mutti JS, Gill KS, Amdam GV (2011) IRS and TOR nutrient-signaling  
527 pathways act via juvenile hormone to influence honey bee caste fate. *J Exp Biol* 214:3977-3984.  
528 doi: 10.1242/jeb.061499
- 529 Ohkawara K, Nakayama M, Satoh A, Trindl A, Heinze J (2006) Clonal reproduction and genetic caste  
530 differences in a queen-polymorphic ant, *Vollenhovia emeryi*. *Biology Letters* 2:359-363
- 531 Pendrel B, Plowright R (1981) Larval feeding by adult bumble bee workers (Hymenoptera: Apidae).  
532 *Behavioral Ecology and Sociobiology* 8:71-76
- 533 Pereboom JJ, Jordan WC, Sumner S, Hammond RL, Bourke AF (2005) Differential gene expression in  
534 queen-worker caste determination in bumble-bees. *Proc Biol Sci* 272:1145-1152. doi:  
535 10.1098/rspb.2005.3060
- 536 Pereboom JJM (2000) The composition of larval food and the significance of exocrine secretions in the  
537 bumblebee *Bombus terrestris*. *Insectes Sociaux* 47:11-20. doi: 10.1007/s000400050003
- 538 Pereboom JJM, Duchateau MJ, Velthuis HHW (2003) The organisation of larval feeding in bumblebees  
539 (Hymenoptera, Apidae) and its significance to caste differentiation. *Insectes Sociaux* 50:127-133.  
540 doi: 10.1007/s00040-003-0639-7

- 541 Plowright RC, Jay SC (1968) Caste differentiation in bumblebees (*Bombus* Latr.: Hym.) I. — The  
542 determination of female size. *Insectes Sociaux* 15:171-192. doi: 10.1007/bf02223465
- 543 Plowright RC, Jay SC (1977) On the size determination of bumble bee castes (Hymenoptera: Apidae).  
544 *Canadian Journal of Zoology* 55:1133-1138. doi: 10.1139/z77-146
- 545 Plowright RC, Pendrel BA (1977) LARVAL GROWTH IN BUMBLE BEES (HYMENOPTERA: APIDAE). The  
546 *Canadian Entomologist* 109:967-973. doi: 10.4039/ent109967-7
- 547 Poulsen M, Hughes WO, Boomsma J (2006) Differential resistance and the importance of antibiotic  
548 production in *Acromyrmex echinator* leaf-cutting ant castes towards the entomopathogenic  
549 fungus *Aspergillus nomius*. *Insectes Sociaux* 53:349-355
- 550 Quezada-Euán JJG, López-Velasco A, Pérez-Balam J, Moo-Valle H, Velazquez-Madrazo A, Paxton RJ  
551 (2011) Body size differs in workers produced across time and is associated with variation in the  
552 quantity and composition of larval food in *Nannotrigona perilampoides* (Hymenoptera,  
553 Meliponini). 58:31-38. doi: 10.1007/s00040-010-0113-2
- 554 Ramalho M, Imperatriz-Fonseca V, L., Giannini T, C. (1998) Within-colony size variation of foragers and  
555 pollen load capacity in the stingless bee *Melipona quadrifasciata anthidioides* Lepeletier  
556 (Apidae, Hymenoptera). *Apidologie* 29:221-228
- 557 Ribeiro MF, Velthuis HHW, Duchateau MJ, van der Tweel I (1999) Feeding frequency and caste  
558 differentiation in *Bombus terrestris* larvae. *Insectes Sociaux* 46:306-314. doi:  
559 10.1007/s000400050150
- 560 Richards MH, Packer L (1996) The socioecology of body size variation in the primitively eusocial sweat  
561 bee, *Halictus ligatus* (Hymenoptera: Halictidae). *Oikos* 77:68-76. doi: 10.2307/3545586
- 562 Roisin Y (2000) Diversity and Evolution of Caste Patterns. Springer Netherlands, pp 95-119
- 563 Röseler P-F (1970) Unterschiede in der Kastendetermination zwischen den Hummelarten *Bombus*  
564 *hypnorum* und *Bombus terrestris* / Differences in the Caste Determination between the  
565 Bumblebee Species *Bombus hypnorum* and *Bombus terrestris*. *Zeitschrift für Naturforschung B*  
566 25:543-548. doi: doi:10.1515/znB-1970-0521
- 567 Roseler PF (1976) Juvenile hormone and queen rearing in bumblebees. Phase and Caste Determination  
568 in *Insects* 1:55-61
- 569 Ruel C, Cerdá X, Boulay R (2012) Behaviour-mediated group size effect constrains reproductive decisions  
570 in a social insect. *Animal Behaviour* 84:853-860. doi: 10.1016/j.anbehav.2012.07.006
- 571 Santos PKF, Murray CS, Amsalem E (2022) Sexual production is regulated by the brood in *Bombus*  
572 *impatiens* colonies. bioRxiv:2022.2007.2004.498320. doi: 10.1101/2022.07.04.498320
- 573 Schwander T, Lo N, Beekman M, Oldroyd BP, Keller L (2010) Nature versus nurture in social insect caste  
574 differentiation. *Trends in Ecology & Evolution* 25:275-282. doi:  
575 <https://doi.org/10.1016/j.tree.2009.12.001>
- 576 Shpigler H, Tamarkin M, Gruber Y, Poleg M, Siegel AJ, Bloch G (2013) Social influences on body size and  
577 developmental time in the bumblebee *Bombus terrestris*. *Behavioral Ecology and Sociobiology*  
578 67:1601-1612. doi: 10.1007/s00265-013-1571-0
- 579 Simpson SJ, Sword GA, Lo N (2011) Polyphenism in insects. *Current Biology* 21:R738-R749
- 580 Smith AR, Wcislo WT, O'Donnell S (2008a) Body size shapes caste expression, and cleptoparasitism  
581 reduces body size in the facultatively eusocial bees *Megalopta* (Hymenoptera: Halictidae).  
582 *Journal of insect behavior* 21:394
- 583 Smith C, Anderson K, Tillberg C, Gadau J, Suarez A (2008b) Caste Determination in a Polymorphic Social  
584 Insect: Nutritional, Social, and Genetic Factors. *The American Naturalist* 172:497-507. doi:  
585 10.1086/590961
- 586 Starkey J, Brown A, Amsalem E (2019) The road to sociality: brood regulation of worker reproduction in  
587 the simple eusocial bee *Bombus impatiens*. *Animal Behaviour* 154:57-65. doi:  
588 10.1016/j.anbehav.2019.06.004

- 589 Suryanarayanan S, Hermanson JC, Jeanne RL (2011) A mechanical signal biases caste development in a  
590 social wasp. *Current Biology* 21:231-235
- 591 Sutcliffe GH, Plowright RC (1988) THE EFFECTS OF FOOD SUPPLY ON ADULT SIZE IN THE BUMBLE BEE  
592 BOMBUS TERRICOLA KIRBY (HYMENOPTERA: APIDAE). *The Canadian Entomologist* 120:1051-  
593 1058. doi: 10.4039/ent1201051-12
- 594 Tarpy DR, Hatch S, Fletcher DJC (2000) The influence of queen age and quality during queen  
595 replacement in honeybee colonies. *Animal Behaviour* 59:97-101. doi: 10.1006/anbe.1999.1311
- 596 Tian L, Hines HM (2018) Morphological characterization and staging of bumble bee pupae. *PeerJ*  
597 6:e6089. doi: 10.7717/peerj.6089
- 598 Treanore E et al. (2021) Optimizing laboratory rearing of a key pollinator, *Bombus impatiens*. *Insects* 12.  
599 doi: 10.3390/insects12080673
- 600 Treanore ED, Derstine N, Amsalem E (2020a) What can mechanisms underlying derived traits tell us  
601 about the evolution of social behavior? *Annals of the Entomological Society of America*  
602 Accepted
- 603 Treanore ED, Kiner JM, Kerner ME, Amsalem E (2020b) Shift in worker physiology and gene expression  
604 pattern from reproductive to diapause-like with colony age in the bumble bee *Bombus*  
605 *impatiens*. *The Journal of Experimental Biology* 223:jeb218768. doi: 10.1242/jeb.218768
- 606 Tribble W, Kronauer DJC (2017) Caste development and evolution in ants: it's all about size. *Journal of*  
607 *Experimental Biology* 220:53-62. doi: 10.1242/jeb.145292
- 608 Villalta I, Blight O, Angulo E, Cerdá X, Boulay R (2016) Early developmental processes limit socially  
609 mediated phenotypic plasticity in an ant. *Behavioral Ecology and Sociobiology* 70:285-291. doi:  
610 10.1007/s00265-015-2052-4
- 611 Vogt FD (1986) Thermoregulation in bumblebee colonies. II. Behavioral and demographic variation  
612 throughout the colony cycle. *Physiological Zoology* 59:60-68
- 613 Weiner SA, Toth AL (2012) Epigenetics in social insects: a new direction for understanding the evolution  
614 of castes. *Genet Res Int* 2012:609810. doi: 10.1155/2012/609810
- 615 West-Eberhard M (1969) The social biology of *Polistine* wasps. *Miscellaneous Publications Museum of*  
616 *Zoology* 140
- 617 West-Eberhard MJ (1989) Phenotypic plasticity and the origins of diversity. *Annual Review of Ecology*  
618 *and Systematics* 20:249-278
- 619 Wilson EO (1980) Caste and division of labor in leaf-cutter ants (Hymenoptera: Formicidae: *Atta*).  
620 *Behavioral ecology and sociobiology* 7:157-165
- 621 Winston ML (1991) *The biology of the honey bee*. harvard university press
- 622 Yaguchi H, Suzuki R, Matsunami M, Shigenobu S, Maekawa K (2019) Transcriptomic changes during caste  
623 development through social interactions in the termite *Zootermopsis nevadensis*. *Ecology and*  
624 *Evolution* 9:3446-3456. doi: 10.1002/ece3.4976
- 625

## Caption to figures

**Figure 1:** Body mass of female (A) and male (B) larvae and pupae across treatments. Egg batches of either females (laid by a queen) or males (laid by workers) were reared by a single queen or by varying number of workers (1, 3 and 10) and were sampled every day during the entire development period between egg and adult. The sample size per treatment ranges between 235 to 309 individuals (see Table 1 for details).

**Figure 2.** Body mass of female and male larvae and pupae across all treatments. Egg batches of either females (laid by a queen) or males (laid by workers) were reared by a single queen or by varying number of workers (1, 3 and 10) and were sampled every day during the entire development period between egg and adult.

**Figure 3:** The growth rate of female (A) and male (B) larvae reared by a single queen or by varying number of workers (1, 3 and 10). All larvae were included in the analysis (110-165 individuals per treatment, see Table 1 for details). Larvae hatched on day 6 (after eggs were laid) and pupated on days 13 (the earliest) to 18 (the latest). Most larvae (>95%) pupated on days 15-16.

**Figure 4.** The average body mass (A) and duration of development (B) of all the adults emerging in the study (10-15 individuals per treatment, see Table 1 for details). The body mass was measured upon emergence and duration was counted from the day eggs were laid until the emergence of the adult. Asterisks denote significance at  $p < 0.001$  (\*\*\*) and  $p < 0.01$  (\*\*).



Table 1 - The total sample size in the study split into treatments and sex, and the minimum and maximum values for the larvae and pupae duration of development.

|                | Care takers | Total n | Min and Max of larva age (n) | Min and Max of pupa age (n) | Min and Max of adult age (n) |
|----------------|-------------|---------|------------------------------|-----------------------------|------------------------------|
| <b>Females</b> | 1 worker    | 238     | 6-17 (n=127)                 | 14-24 (n=100)               | 24-26 (n=11)                 |
|                | 3 workers   | 238     | 6-16 (n=110)                 | 13-25 (n=115)               | 24-26 (n=13)                 |
|                | 10 workers  | 241     | 6-18 (n=121)                 | 14-25 (n=109)               | 23-26 (n=11)                 |
|                | Queen       | 309     | 6-17 (n=165)                 | 13-23 (n=132)               | 24-25 (n=12)                 |
| <b>Males</b>   | 1 worker    | 247     | 6-16 (n=116)                 | 13-24 (n=116)               | 24-26 (n=15)                 |
|                | 3 workers   | 235     | 6-16 (n=128)                 | 17-26 (n=97)                | 24-26 (n=10)                 |
|                | 10 workers  | 244     | 6-15 (n=112)                 | 16-25 (n=120)               | 24-26 (n=12)                 |
|                | Queen       | 249     | 6-17 (n=116)                 | 13-25 (n=122)               | 24-26 (n=11)                 |

Figure 1

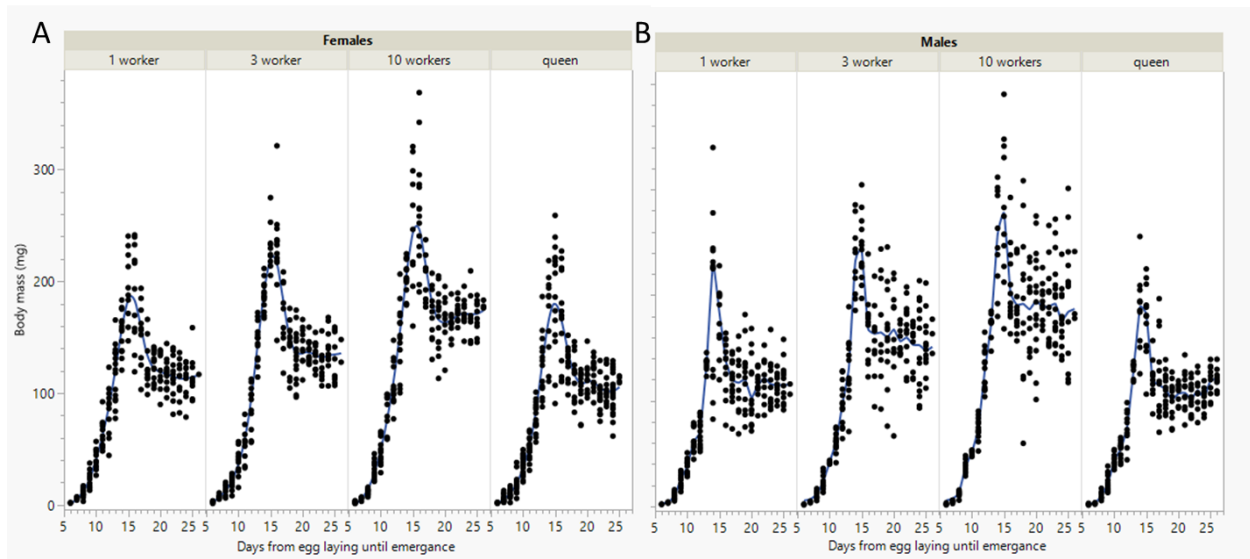

Figure 2

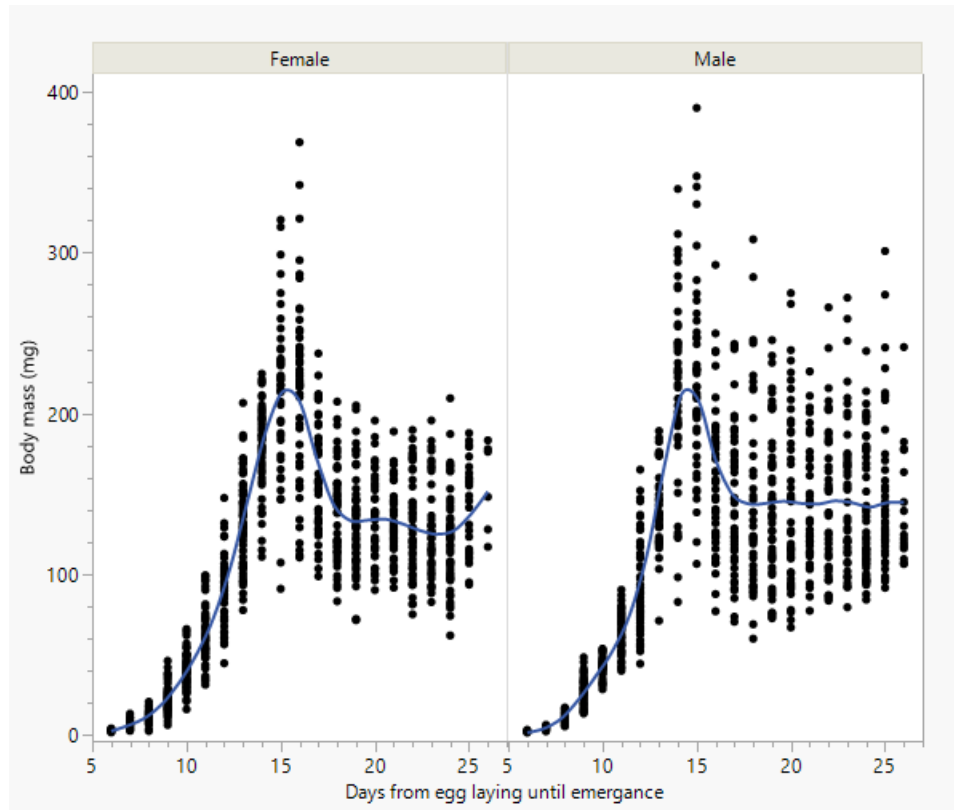

Figure 3

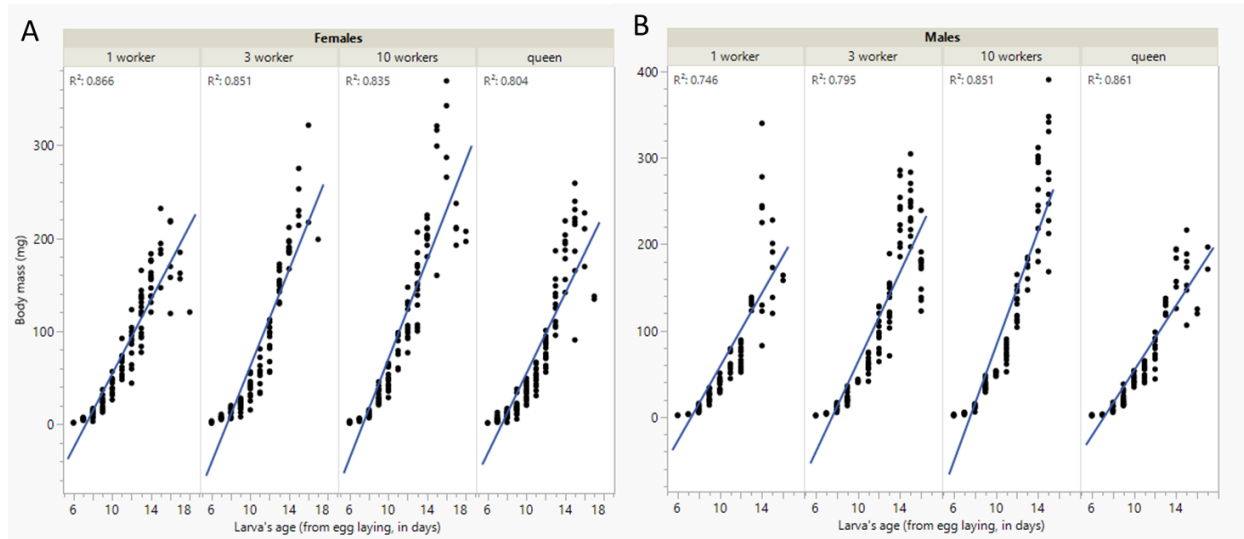

Figure 4

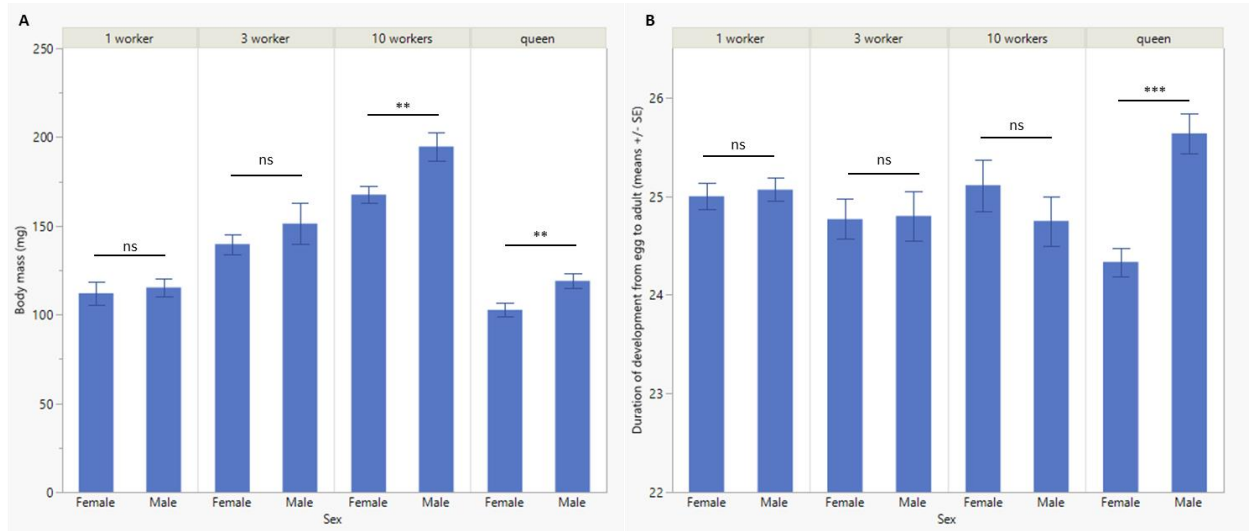

Source: https://www.biorxiv.org/content/10.1101/2022.09.09.507355v1.full.pdf
